# Supplementary material for: Antibodies to vaccine-preventable infections after CAR-T-cell therapy for B-cell malignancies
Source: JCI journal article supplement (doi:10.1172/jci.insight.146743), 2021-04-29
Supplement: sd1 [file 1]

## SUPPLEMENTARY APPENDIX TO

### Antibodies to Vaccine-Preventable Infections after CAR-T-Cell Therapy for B-Cell Malignancies

#### TABLE OF CONTENTS

|                                                                                                                                                                                      |    |
|--------------------------------------------------------------------------------------------------------------------------------------------------------------------------------------|----|
| SUPPLEMENTARY FIGURES .....                                                                                                                                                          | 2  |
| Figure S1. Distribution of serum total IgG stratified by time from most recent IgG replacement therapy .....                                                                         | 2  |
| Figure S2. B-cell subsets in 23 participants with $\geq 20$ CD19 <sup>+</sup> B-cells/ $\mu$ L in peripheral blood .....                                                             | 3  |
| Figure S3. Distribution of absolute CD4 <sup>+</sup> and CD8 <sup>+</sup> T-cell counts.....                                                                                         | 4  |
| Figure S4. Proportion of participants with seroprotective IgG titers to 23 <i>S. pneumoniae</i> serotypes .....                                                                      | 5  |
| Figure S5. Absolute pathogen-specific IgG titers for <i>S. pneumoniae</i> serotypes stratified by CD19- versus BCMA-CAR-T-cell therapy.....                                          | 6  |
| Figure S6. Association of secondary clinical variables with seroprotective antibody titers and epitope hits.                                                                         | 7  |
| SUPPLEMENTARY TABLES .....                                                                                                                                                           | 8  |
| Table S1. Details of the CAR-T-cell products and protocols for enrolled participants.....                                                                                            | 8  |
| Table S2. Normal ranges of total IgG, IgA, and IgM.....                                                                                                                              | 10 |
| Table S3. Tests and interpretation of serum antibody titers to twelve vaccine-preventable infections.....                                                                            | 11 |
| Table S4. Reference values for 23 <i>S. pneumoniae</i> serotypes .....                                                                                                               | 12 |
| Table S5. Number of participants who were tested and had seroprotective antibody titers for each vaccine-preventable infection among 30 adults without IgG replacement therapy ..... | 13 |
| Table S6. Association of clinical variables with epitope hits by univariate and multivariable linear regression analysis.....                                                        | 15 |
| CONFLICT OF INTEREST STATEMENT.....                                                                                                                                                  | 17 |

## SUPPLEMENTARY FIGURES

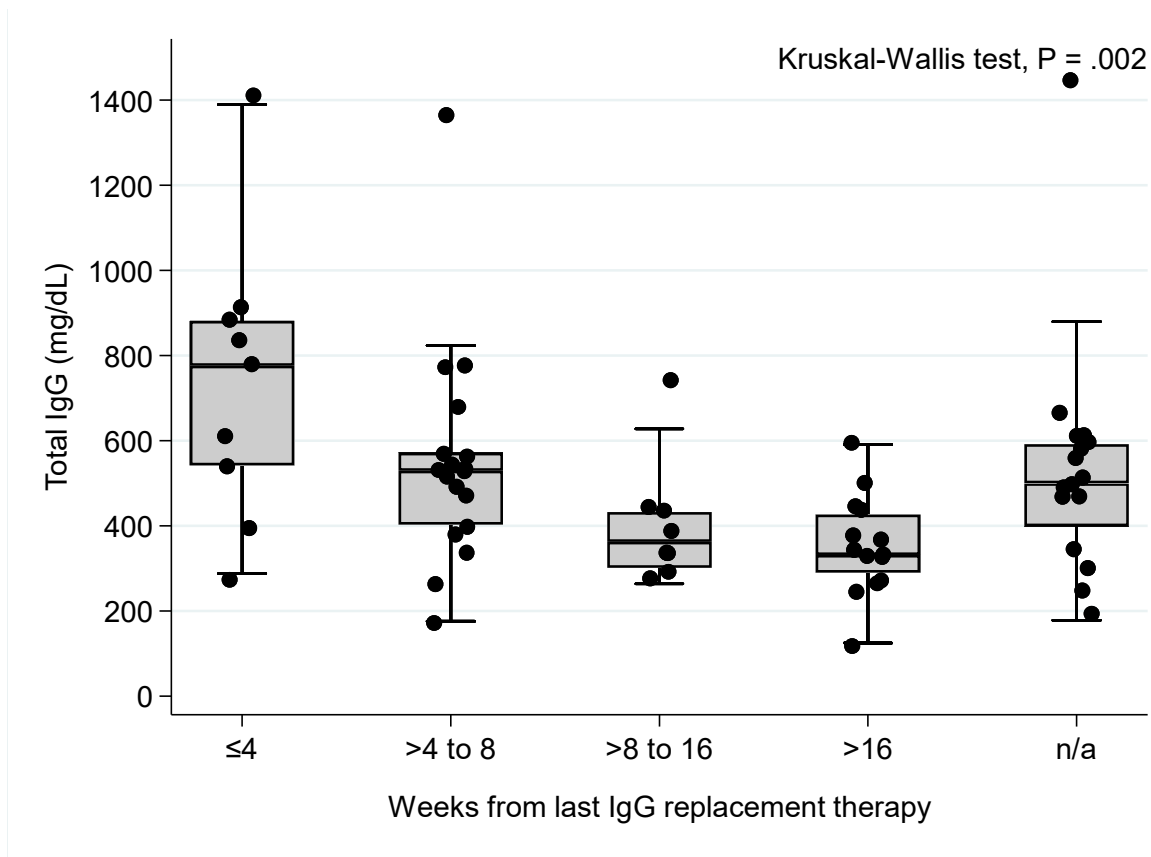

**Figure S1. Distribution of serum total IgG stratified by time from most recent IgG replacement therapy (IGRT)**

Each dot represents results from an individual participant ( $n=65$ ). Boxes represent the interquartile range, horizontal lines represent the median, and whiskers are set at 1.5 times the interquartile range below the lower quartile and above the upper quartile. Total IgG levels differed significantly among the groups defined by timing of most recent IGRT, with higher levels among participants whose sample was obtained closer to replacement IGRT (Kruskal-Wallis test,  $P = .002$ ). “n/a” indicates participants who did not receive IGRT between CAR-T-cell infusion and sample collection.

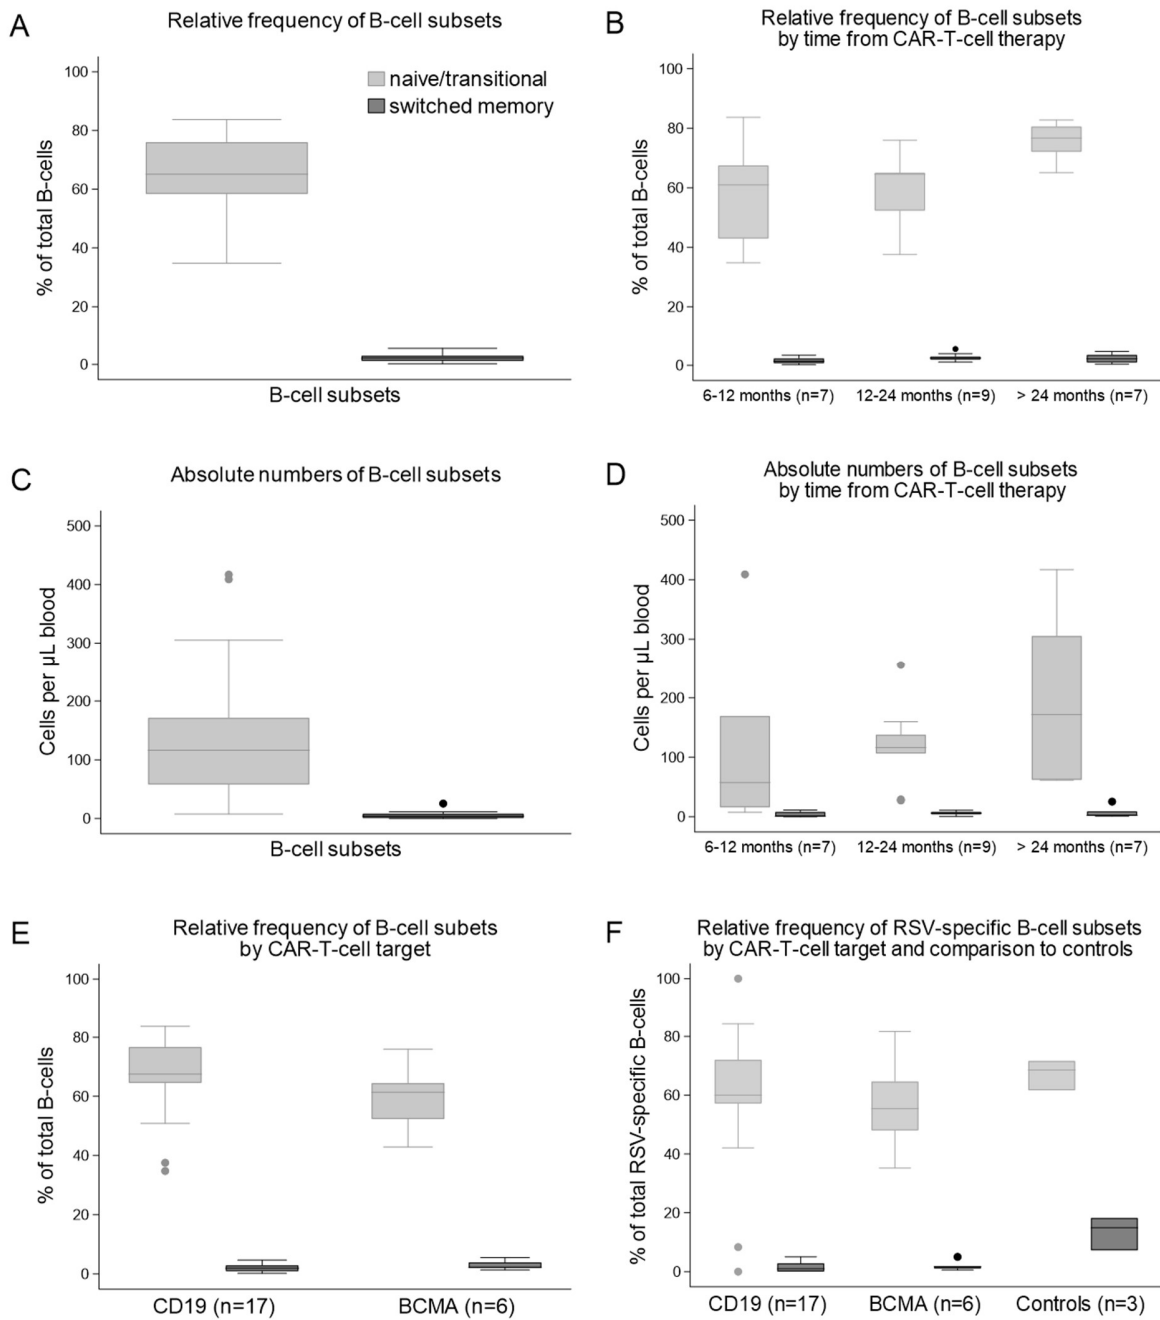

**Figure S2. B-cell subsets in 23 participants with  $\geq 20$  CD19<sup>+</sup> B-cells/ $\mu\text{L}$  in peripheral blood**

(A) B-cell subsets presented as percentage of total B-cells and (C) as absolute cell counts. (B) B-cell subsets presented as percentage of total B-cells stratified by time period from CAR-T-cell therapy and (D) as absolute cell counts stratified by time period from CAR-T-cell therapy. (E) B-cell subsets presented as percentages of total B-cells stratified by CAR-T-cell target. (F) RSV-specific B-cell subsets presented as percentage of total RSV-specific B-cells and stratified by CAR-T-cell target; also shown are data from three healthy adult controls. CD19<sup>+</sup> B-cell subsets were delineated as follows: transitional B-cells (CD27<sup>-</sup>CD38<sup>+</sup>IgM<sup>hi</sup>IgD<sup>low</sup>), naïve B-cells (CD27<sup>-</sup>CD38<sup>+</sup>IgD<sup>+</sup>), switched memory B-cells (CD27<sup>+</sup>IgD<sup>-</sup>), and RSV-specific B-cells (FVD<sup>-</sup>/CD14<sup>-</sup>/CD16<sup>-</sup>/CD3<sup>-</sup>/CD45<sup>+</sup>/CD19<sup>+</sup>/HIS<sup>-</sup>/RSV preF<sup>+</sup>). In all panels, boxes represent the interquartile range, horizontal lines represent the median, whiskers are set at 1.5 times the interquartile range below the lower quartile and above the upper quartile, and dots are outliers.

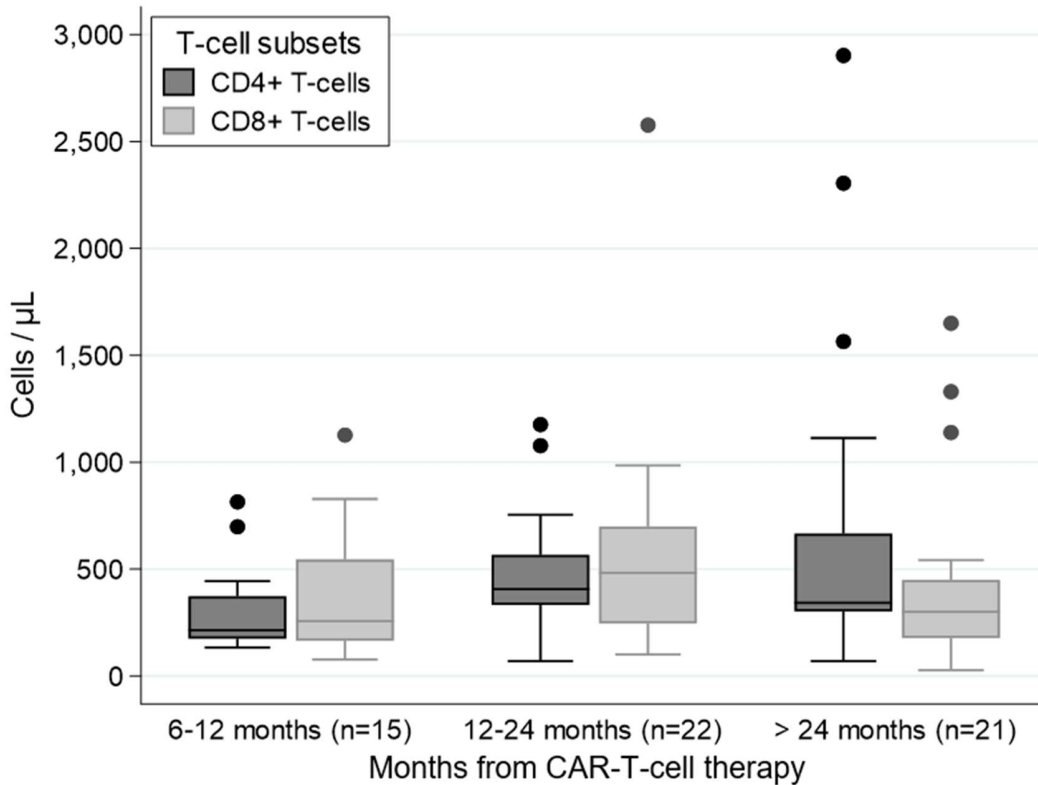

**Figure S3. Distribution of absolute CD4<sup>+</sup> and CD8<sup>+</sup> T-cell counts stratified by time from CAR-T-cell therapy**

These box plots illustrate the absolute CD4<sup>+</sup> and CD8<sup>+</sup> T-cell counts among 58 participants with available results, stratified by time from CAR-T-cell infusion. Boxes present the interquartile range, horizontal lines represent the median, whiskers are set at 1.5 times the interquartile range below the lower quartile and above the upper quartile, and dots are outliers. Lower limits of normal are 730 cells/μL for CD4<sup>+</sup> T-cells and 250 cells/μL for CD8<sup>+</sup> T-cells.

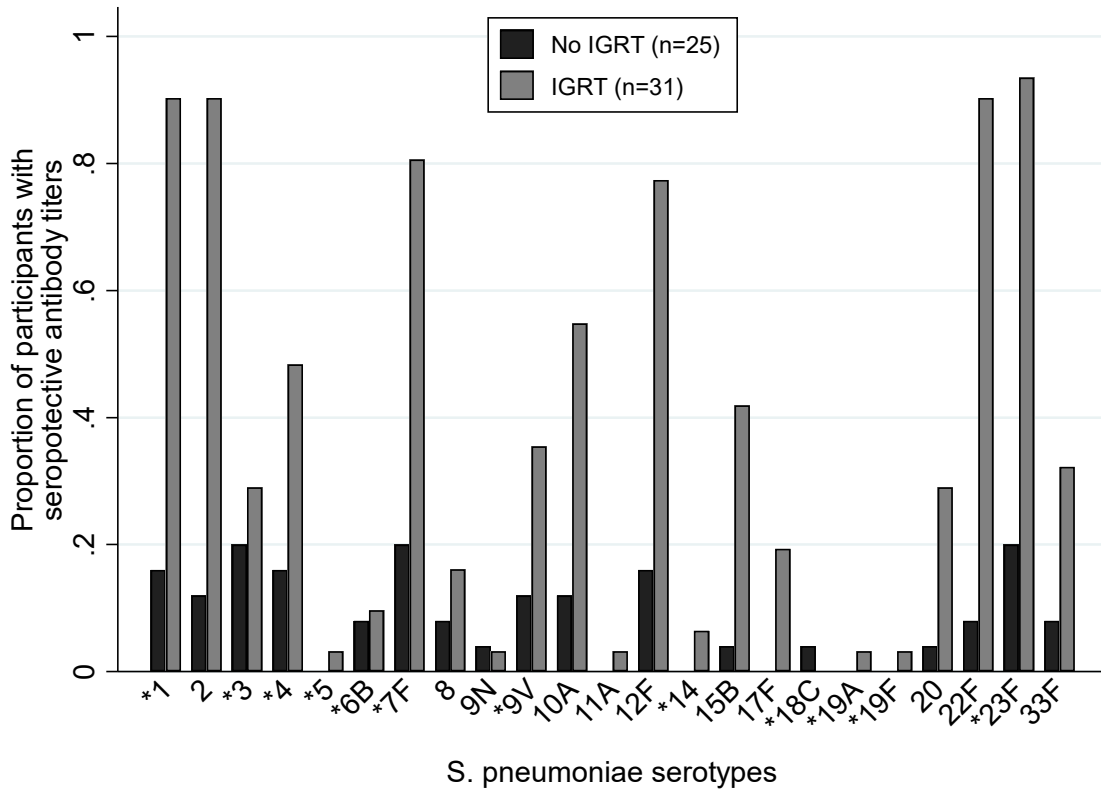

**Figure S4. Proportion of participants with seroprotective IgG titers to 23 *S. pneumoniae* serotypes stratified by receipt of IgG replacement therapy (IGRT) within the previous 16 weeks**

All 23 *S. pneumoniae* serotypes are contained in the 23-valent nonconjugated polysaccharide vaccines.

Serotypes included in the pneumococcal conjugate vaccine (PCV13) are indicated by a \*.

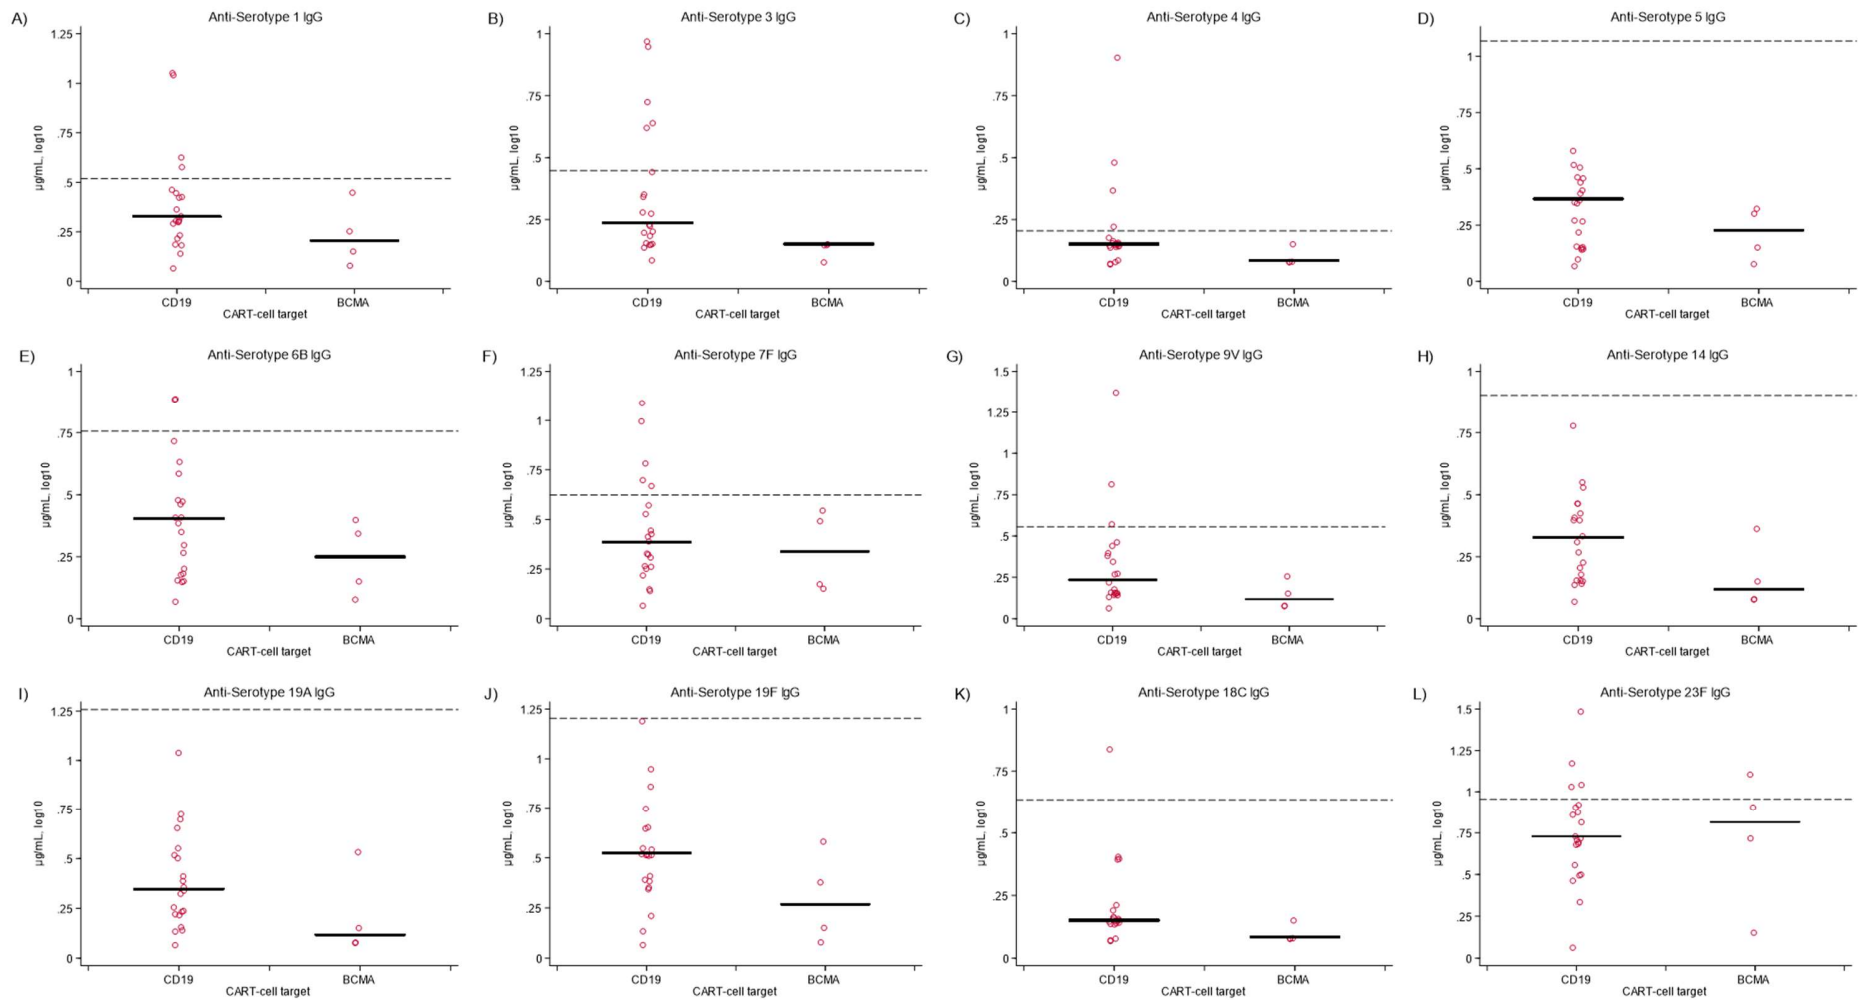

**Figure S5. Absolute pathogen-specific IgG titers for *S. pneumoniae* serotypes stratified by CD19- (n=21) versus BCMA-CAR-T-cell therapy (n=4) among participants without IGRT in the previous 16 weeks**

Serotypes displayed are contained in Pevnar 13. In all panels, solid black horizontal bars represent the median and horizontal dashed reference lines represent the cut-off value for seroprotection. Each data point represents a participant. Anti-IgG values were transformed using  $\log_{10}(\text{value}+1)$ .

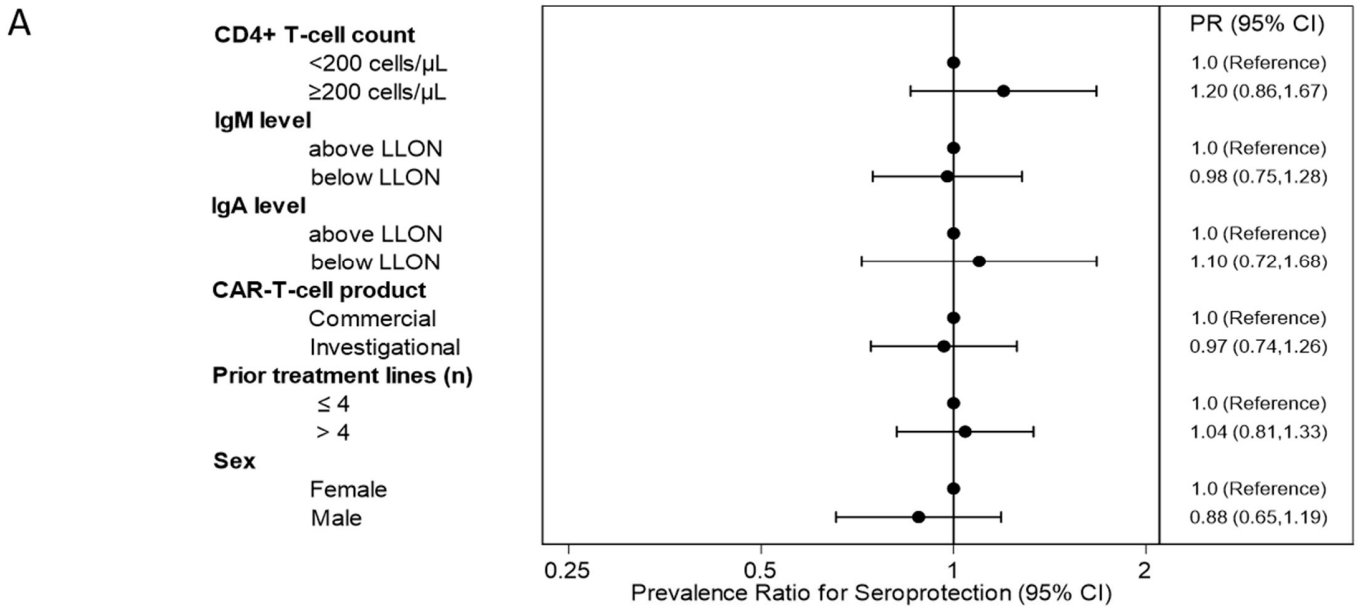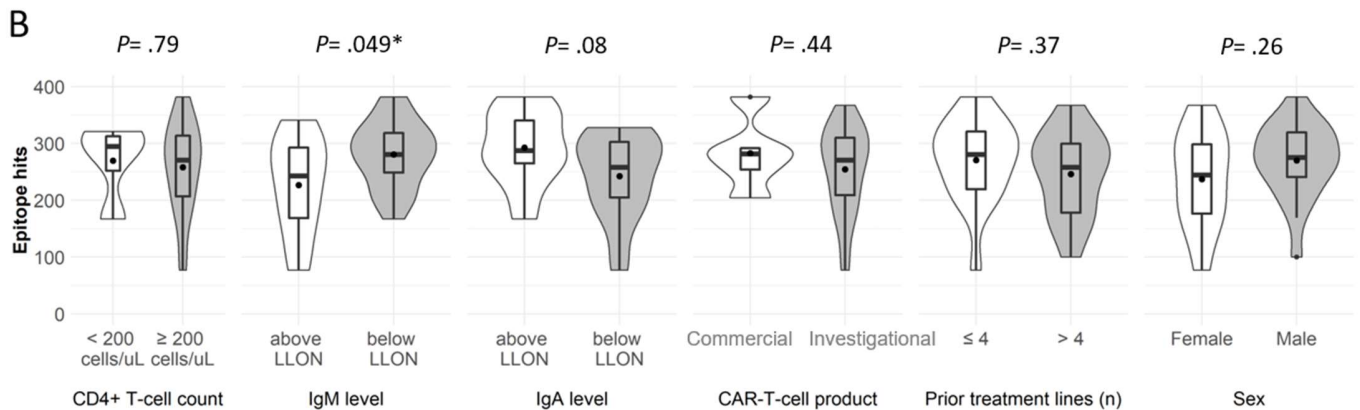

**Figure S6. Association of secondary clinical variables with seroprotective antibody titers and epitope hits among 30 participants without IGRT in the previous 16 weeks**

Supplementary to Figure 6 in the main manuscript, **(A)** this forest plot demonstrates associations of additional clinical variables with the prevalence of seroprotective antibody titers. Values  $<1$  indicate a lower prevalence of seroprotective antibody titers. Dots represent prevalence ratios (PR), and whiskers indicate the 95% confidence interval (CI). LLON indicates the lower limit of normal. **(B)** Violin plots comparing the number of viral or bacterial epitopes recognized by IgG by clinical variables. Violins show the distribution of the data. Boxplots indicate the interquartile range and median. Dots in the boxes indicate the mean. P-values are derived from the univariate regression model (**Table S6**). \*The IgM level variable remained significant in an adjusted model.

**SUPPLEMENTARY TABLES**

**Table S1. Details of the CAR-T-cell products and protocols for enrolled participants**

| No. of participants                | Commercial product/study protocol | Study phase | Age    | Underlying diseases                                 | CAR-T-cell target | Co-stimulatory domain |
|------------------------------------|-----------------------------------|-------------|--------|-----------------------------------------------------|-------------------|-----------------------|
| Commercial CAR-T-cell product      |                                   |             |        |                                                     |                   |                       |
| 9                                  | Axicabtagene ciloleucel           | n/a         | adults | large B-cell lymphoma                               | CD19              | CD28                  |
| Investigational CAR-T-cell product |                                   |             |        |                                                     |                   |                       |
| 4                                  | NCT02631044 <sup>A</sup>          | 1           | ≥18y   | NHL                                                 | CD19              | 4-1BB                 |
| 3                                  | NCT03105336 <sup>B</sup>          | 2           | ≥18y   | NHL                                                 | CD19              | CD28                  |
| 20                                 | NCT01865617                       | 1/2         | ≥18y   | ALL, CLL, NHL                                       | CD19              | 4-1BB                 |
| 4                                  | NCT03103971                       | 1           | ≥18y   | ALL, NHL                                            | CD19              | 4-1BB                 |
| 2                                  | NCT02706405                       | 1           | ≥18y   | NHL                                                 | CD19              | 4-1BB                 |
| 7                                  | NCT03338972                       | 1           | >21y   | MM                                                  | BCMA              | 4-1BB                 |
| 4                                  | NCT03502577                       | 1           | >21y   | MM                                                  | BCMA              | 4-1BB                 |
| 11                                 | NCT02028455 <sup>C</sup>          | 1/2         | 1-26y  | ALL                                                 | CD19              | 4-1BB                 |
| 1                                  | NCT03330691                       | 1           | 1-26y  | CD19 <sup>+</sup><br>/CD22 <sup>+</sup><br>leukemia | CD19/22           | 4-1BB                 |



---

ALL indicates acute lymphoblastic leukemia; CLL, chronic lymphocytic leukemia; MM, multiple myeloma; NHL, non-Hodgkin lymphoma; y, years

<sup>A</sup>This study used lisocabtagene maraleucel

<sup>B</sup>This study used axicabtagene ciloleucel

<sup>C</sup>Eligible individuals may have participated in protocol NCT03186118, a phase 1 pilot study for CD19 T-antigen presenting cells (T-APCs) following CAR-T-cell immunotherapy.

**Table S2. Normal ranges of total IgG, IgA, and IgM by age**

| IgG interpretation |               | IgA interpretation |               | IgM interpretation |               |
|--------------------|---------------|--------------------|---------------|--------------------|---------------|
| Age                | Range (mg/dL) | Age                | Range (mg/dL) | Age                | Range (mg/dL) |
| 0-1y               | 327-1270      | 0-11m              | 0-83          | 1d-14d             | 5-30          |
| 2y-3y              | 468-1250      | 1y-3y              | 20-100        | 15d-5m             | 15-109        |
| 4y-5y              | 532-1340      | 4y-6y              | 27-195        | 6m-1y              | 43-239        |
| 6y-7y              | 454-1360      | 7y-9y              | 34-305        | 2y-5y              | 50-199        |
| 8y-9y              | 568-1360      | 10y-11y            | 53-204        | 6y-11y             | 50-260        |
| 10y-11y            | 568-1490      | 12y-13y            | 58-358        | 12y-16y            | 45-240        |
| 12y-13y            | 664-1490      | 14y-15y            | 47-249        | ≥17y               | 40-350        |
| 14y-17y            | 550-1440      | 16y-19y            | 61-348        |                    |               |
| ≥18y               | 610-1616      | ≥20y               | 84-499        |                    |               |

d indicates days; m, months; y, years.

**Table S3. Tests and interpretation of serum antibody titers to twelve vaccine-preventable infections**

| Pathogen                                       | Laboratory               | Method                 | Test name, manufacturer                                                   | Threshold for positive result <sup>a</sup>                                  |
|------------------------------------------------|--------------------------|------------------------|---------------------------------------------------------------------------|-----------------------------------------------------------------------------|
| Hepatitis A virus (HAV)                        | University of Washington | Chemiluminescence      | Architect HAVAb-IgG, Abbott Diagnostics                                   | ≥1.0 signal/cutoff ratio                                                    |
| Hepatitis B virus (HBV), surface antibody      | University of Washington | Chemiluminescence      | Architect AUSAB, Abbott Diagnostics                                       | ≥12 mIU/mL                                                                  |
| Varicella zoster virus (VZV)                   | University of Washington | IFA                    | VZV IgG IFA, Hemagen Diagnostics                                          | >1:8 dilution                                                               |
| Measles (Rubeola)                              | University of Washington | ELISA                  | ELISA Measles IgG Test System, Zeus Scientific                            | ≥1.10 index value                                                           |
| Mumps                                          | University of Washington | ELISA                  | ELISA Mumps IgG Test System, Zeus Scientific                              | ≥1.10 index value                                                           |
| Rubella                                        | University of Washington | ELISA                  | ELISA Rubella IgG Test System, Zeus Scientific                            | ≥1.10 index value                                                           |
| <i>Haemophilus influenzae</i> type b           | University of Washington | ELISA                  | VaccZyme <i>Haemophilus influenzae</i> type b IgG kit, Binding Site       | >1.00 mg/L                                                                  |
| <i>Clostridium tetani</i>                      | Mayo Clinic Laboratories | ELISA                  | Anti-Tetanus Toxoid ELISA (IgG), EuroImmun US                             | ≥0.01 IU/mL <sup>b</sup>                                                    |
| <i>Corynebacterium diphtheriae</i>             | Mayo Clinic Laboratories | ELISA                  | Anti-Diphtheria Toxoid ELISA (IgG), EuroImmun US                          | ≥0.01 IU/mL <sup>c</sup>                                                    |
| <i>Bordetella pertussis</i>                    | Mayo Clinic Laboratories | ELISA                  | Anti-Bordetella pertussis toxin ELISA (IgG), EuroImmun US                 | ≥100 IU/mL                                                                  |
| <i>Streptococcus pneumoniae</i> , 23 Serotypes | Mayo Clinic Laboratories | Microsphere photometry | <i>Streptococcus pneumoniae</i> IgG Antibodies, 23 Serotypes, Mayo Clinic | Results ≥ reference value for at least 50% of serotypes ( <b>Table S4</b> ) |
| Poliovirus (Types 1, 3)                        | Quest Diagnostics        | Neutralization         | Poliovirus (Types 1, 3) Antibodies, Quest Diagnostics                     | ≥1:8 dilution                                                               |

<sup>a</sup>Positive results are referred to as seroprotective for the purposes of this study.

<sup>b</sup>A tetanus toxoid booster should be considered for values between 0.01 IU/mL and 0.5 IU/mL.

<sup>c</sup>A diphtheria toxoid booster should be considered for values between 0.01 IU/mL and <0.1 IU/mL. ELISA indicates enzyme-linked immunosorbent assay; IFA, indirect fluorescence antibody.

**Table S4. Reference values for 23 *S. pneumoniae* serotypes (Mayo Clinic Laboratories)**

| <b>Serotype</b> | <b>Reference value<br/>(mcg/mL)</b> | <b>Serotype</b> | <b>Reference value<br/>(mcg/mL)</b> |
|-----------------|-------------------------------------|-----------------|-------------------------------------|
| 1 (1)           | ≥2.3                                | 22F (22)        | ≥7.2                                |
| 2 (2)           | ≥1.0                                | 23F (23)        | ≥8.0                                |
| 3 (3)           | ≥1.8                                | 6B (26)         | ≥4.7                                |
| 4 (4)           | ≥0.6                                | 10A (34)        | ≥2.9                                |
| 5 (5)           | ≥10.7                               | 11A (43)        | ≥2.4                                |
| 8 (8)           | ≥2.9                                | 7F (51)         | ≥3.2                                |
| 9N (9)          | ≥9.2                                | 15B (54)        | ≥3.3                                |
| 12F (12)        | ≥0.6                                | 18C (56)        | ≥3.3                                |
| 14 (14)         | ≥7.0                                | 19A (57)        | ≥17.1                               |
| 17F (17)        | ≥7.8                                | 9V (68)         | ≥2.6                                |
| 19F (19)        | ≥15.0                               | 33F (70)        | ≥1.7                                |
| 20 (20)         | ≥1.3                                |                 |                                     |

**Table S5. Number of participants who were tested and had seroprotective antibody titers for each vaccine-preventable infection among 30 adults without IgG replacement therapy within the previous 16 weeks**

| <b>Vaccine-preventable infection</b> | <b>Overall</b>                                                               |                                                                                | <b>CD19-CAR-T-cell therapy recipients</b>                                    |                                                                                | <b>BCMA-CAR-T-cell therapy recipients</b>                                    |                                                                                |
|--------------------------------------|------------------------------------------------------------------------------|--------------------------------------------------------------------------------|------------------------------------------------------------------------------|--------------------------------------------------------------------------------|------------------------------------------------------------------------------|--------------------------------------------------------------------------------|
|                                      | No. of participants with seroprotective antibody titers / valid test results | Percentage of participants with seroprotective antibody titers (Wilson 95% CI) | No. of participants with seroprotective antibody titers / valid test results | Percentage of participants with seroprotective antibody titers (Wilson 95% CI) | No. of participants with seroprotective antibody titers / valid test results | Percentage of participants with seroprotective antibody titers (Wilson 95% CI) |
| Varicella zoster                     | 24/ 26                                                                       | 92 (76-98)                                                                     | 22/ 22                                                                       | 100 (85-100)                                                                   | 2/ 4                                                                         | 50 (15-85)                                                                     |
| Rubella                              | 27/30                                                                        | 90 (74-97)                                                                     | 24/ 26                                                                       | 92 (76-98)                                                                     | 3/ 4                                                                         | 75 (30-95)                                                                     |
| Polio                                | 25/ 28                                                                       | 89 (73-96)                                                                     | 23/ 24                                                                       | 96 (80-99)                                                                     | 2/ 4                                                                         | 50 (15-85)                                                                     |
| Tetanus                              | 25/ 28                                                                       | 89 (73-96)                                                                     | 22/ 24                                                                       | 92 (74-98)                                                                     | 3/ 4                                                                         | 75 (30-95)                                                                     |
| Diphtheria                           | 25/ 28                                                                       | 89 (73-96)                                                                     | 23/ 24                                                                       | 96 (80-99)                                                                     | 2/ 2                                                                         | 50 (15-85)                                                                     |
| Measles                              | 24/ 30                                                                       | 80 (63-90)                                                                     | 24/ 25                                                                       | 92 (76-98)                                                                     | 0/ 4                                                                         | 0 (0-49)                                                                       |
| Mumps                                | 15/ 30                                                                       | 50 (33-67)                                                                     | 15/ 26                                                                       | 58 (39-74)                                                                     | 0/ 4                                                                         | 0 (0-49)                                                                       |
| Hepatitis A                          | 12/ 28                                                                       | 43 (27-61)                                                                     | 11/ 24                                                                       | 46 (28-65)                                                                     | 1/ 4                                                                         | 25 (5-70)                                                                      |
| Hepatitis B                          | 11/ 28                                                                       | 39 (24-58)                                                                     | 10/ 24                                                                       | 42 (24-61)                                                                     | 1/ 4                                                                         | 25 (5-70)                                                                      |
| <i>H. influenzae</i> type b          | 4/ 27                                                                        | 15 (6-32)                                                                      | 4/ 23                                                                        | 17 (7-37)                                                                      | 0/ 4                                                                         | 0 (0-49)                                                                       |
| <i>S. pneumoniae</i>                 | 0/ 25                                                                        | 0 (0-13)                                                                       | 0/ 21                                                                        | 0 (0-15)                                                                       | 0/ 4                                                                         | 0 (0-49)                                                                       |
| Pertussis                            | 0/ 14                                                                        | 0 (0-22)                                                                       | 0/ 13                                                                        | 0 (0-23)                                                                       | 0/ 1                                                                         | 0 (0-79)                                                                       |

In these analyses, we included 701 of 780 pathogen-specific IgG results (90%). Seventy-nine results were not analyzed for the following reasons. Based on initial test results for pertussis demonstrating that no

---

patients had seroprotective antibody titers in the first batch of 31 participants, we did not test for pertussis in the second batch of the remaining 34 individuals. Four results (pertussis, diphtheria, tetanus, *S. pneumoniae*) could not be interpreted in a participant with lipemia. Forty-one results were excluded due to a corresponding vaccination after CAR-T-cell therapy and before sample collection (5 participants were vaccinated for varicella zoster, 3 for polio, 5 for tetanus/diphtheria, 1 for measles/mumps/rubella, 4 for hepatitis A, 4 or hepatitis B, 4 for *H. influenzae* type b, and 8 for *S. pneumoniae*). Equivocal results were considered as non-seroprotective and affected 1 result for varicella zoster, 2 for mumps, and 30 for *H. influenzae* type B.

**Table S6. Association of clinical variables with epitope hits by univariate and multivariable linear regression analysis among 30 participants without IgG replacement therapy in the previous 16 weeks**

| Variables                            | Unadjusted $\beta$ -coefficient  |                | Adjusted $\beta$ -coefficient    |                |
|--------------------------------------|----------------------------------|----------------|----------------------------------|----------------|
|                                      | (number of epitopes)<br>(95% CI) | <i>P</i> value | (number of epitopes)<br>(95% CI) | <i>P</i> value |
| <b>CAR-T-cell target</b>             |                                  |                |                                  |                |
| CD19                                 | Ref                              | -              | -                                |                |
| BCMA                                 | -140.6 (-200.4, -80.8)           | <.001          | -89.6 (-157.4, -21.9)            | .02            |
| <b>Age</b>                           |                                  |                |                                  |                |
| ≤60 years                            | Ref                              | -              |                                  |                |
| >60 years                            | -8.7 (-62.5, 45.2)               | .75            |                                  |                |
| <b>Total IgG</b>                     |                                  |                |                                  |                |
| ≥400 mg/dL                           | Ref                              | -              |                                  |                |
| <400 mg/dL                           | -38.6 (-90.7, 13.6)              | .16            |                                  |                |
| <b>Prior HCT</b>                     |                                  |                |                                  |                |
| No                                   | Ref                              | -              | Ref                              |                |
| Yes                                  | -77.5 (-127.0, -28.0)            | .005           | -54.4 (-107.0, -1.8)             | .05            |
| <b>Time from CAR-T cell infusion</b> |                                  |                |                                  |                |
| >1 year                              | Ref                              | -              |                                  |                |
| ≤1 year vs.                          | -12.6 (-91.7, 66.6)              | .76            |                                  |                |
| <b>CD19<sup>+</sup> B-cell count</b> |                                  |                |                                  |                |
| >20 cells/ $\mu$ L                   | Ref                              | -              | Ref                              |                |
| ≤20 cells/ $\mu$ L                   | 61.9 (7.3, 116.6)                | .04            | 15.3 (-30.7, 61.2)               | .52            |
| <b>CD4<sup>+</sup> T-cell count</b>  |                                  |                |                                  |                |
| <200 cells/ $\mu$ L                  | Ref                              | -              |                                  |                |
| ≥200 cells/ $\mu$ L                  | -11.3 (-94.8, 72.2)              | .79            |                                  |                |

**IgM level**

|            |                   |      |                   |     |
|------------|-------------------|------|-------------------|-----|
| above LLON | Ref               | -    | Ref               |     |
| below LLON | 54.0 (2.7, 105.2) | .049 | 54.3 (7.9, 100.7) | .03 |

**IgA level**

|            |                     |     |  |  |
|------------|---------------------|-----|--|--|
| above LLON | Ref                 | -   |  |  |
| below LLON | -50.7 (-104.7, 3.4) | .08 |  |  |

**CAR-T cell product**

|                 |                      |     |  |  |
|-----------------|----------------------|-----|--|--|
| Commercial      | Ref                  | -   |  |  |
| Investigational | -28.4 (-100.0, 43.2) | .44 |  |  |

**Prior treatment lines**

|    |                     |     |  |  |
|----|---------------------|-----|--|--|
| ≤4 | Ref                 | -   |  |  |
| >4 | -24.6 (-77.9, 28.6) | .37 |  |  |

**Sex**

|        |                    |     |  |  |
|--------|--------------------|-----|--|--|
| Female | Ref                | -   |  |  |
| Male   | 32.8 (-23.1, 88.6) | .26 |  |  |

---

HCT, hematopoietic cell transplant; LLON, lower limit of normal



## Conflict of interest

JJT received research funding from Vir. AVH received consulting fees from Celgene, a Bristol Myers Squibb (BMS) company. RAG served on an advisory board for Novartis; serves on a steering committee for BMS; and has a patent (US201361898387P) licensed to BMS. AJC received research funding from Janssen, Sanofi, BMS, Harpoon, and Nektar and received consulting fees from Janssen, Cellectar, Sanofi, and AbbVie. DJG has received research funding from, has served as an advisor for, and has received royalties from Juno Therapeutics, a BMS company; has served as an advisor and received research funding from Seattle Genetics and Janssen; has served as an advisor to GlaxoSmithKline, Celgene/BMS, and Legend Biotech; and has received research funding from SpringWorks Therapeutics, Sanofi, and Cellectar Biosciences. MJB received research funding from Merck, Gilead, GlaxoSmithKline, Vir, and Janssen; received consulting fees from Merck, Gilead, Astellas, Janssen, Regeneron, Moderna, Helocyte, and AlloVir; and has stock options for Helocyte. DGM has served as a consultant for A2 Biotherapeutics, Bioline Rx, Juno Therapeutics/BMS, Celgene/BMS, Kite Pharma, Gilead, Novartis, and Pharmacyclics; has received research funding, including salary support from Kite Pharma, Juno Therapeutics/BMS, and Celgene/BMS; has patents with Juno Therapeutics/BMS (pending, not issued, licensed, no royalties, no licenses); and has stock options for A2 Biotherapeutics. CJT received research funding from Juno Therapeutics/BMS, Nektar, AstraZeneca, and TCR2 Therapeutics; is a member of scientific advisory boards for Precision Biosciences, Eureka Therapeutics, Caribou Biosciences, T-CURX, Myeloid Therapeutics, ArsenalBio, and Century Therapeutics; has served on ad hoc advisory boards for Nektar, Allogene Therapeutics, PACT Pharma, AstraZeneca, Amgen, and AsherBio; has stock options for Precision Biosciences, Eureka Therapeutics, Caribou Biosciences, Myeloid Therapeutics, and ArsenalBio; and has patents pending or licensed (not issued) to Juno Therapeutics/BMS. JAH received consulting fees from Allogene Therapeutics and CRISPR Therapeutics and consulting fees and research funding from Gilead.
